# Supplementary material for: High-Accuracy HLA Type Inference from Whole-Genome Sequencing Data Using Population Reference Graphs
Source: PubMed Central journal article supplement (PMC5085092; doi:10.1371/journal.pcbi.1005151), 2016-10-28
Supplement: pcbi.1005151.s002.pdf [file pcbi.1005151.s002.pdf]

| Alleles |      | A    | B    | C    | DOB  | DPA1 | DPB1 | DQA1 | DQB1 | DRA  | DRB1 | DRB3 | DRB4 | DRB5 | E    | F    | G    | H    | J    | K    | L    | V    |
|---------|------|------|------|------|------|------|------|------|------|------|------|------|------|------|------|------|------|------|------|------|------|------|
| 2430    | A    | 100% | 62%  | 64%  | 0%   | 0%   | 0%   | 0%   | 0%   | 0%   | 0%   | 0%   | 0%   | 0%   | 5%   | 4%   | 19%  | 47%  | 13%  | 14%  | 9%   | 4%   |
| 3084    | B    | 76%  | 100% | 100% | 0%   | 0%   | 0%   | 0%   | 0%   | 0%   | 0%   | 0%   | 0%   | 0%   | 6%   | 4%   | 19%  | 35%  | 15%  | 8%   | 9%   | 4%   |
| 2032    | C    | 65%  | 100% | 100% | 0%   | 0%   | 0%   | 0%   | 0%   | 0%   | 0%   | 0%   | 0%   | 0%   | 5%   | 6%   | 21%  | 24%  | 24%  | 9%   | 9%   | 3%   |
| 13      | DOB  | 0%   | 0%   | 0%   | 100% | 0%   | 0%   | 0%   | 0%   | 0%   | 0%   | 0%   | 0%   | 0%   | 0%   | 0%   | 0%   | 0%   | 0%   | 0%   | 0%   | 0%   |
| 37      | DPA1 | 0%   | 0%   | 0%   | 0%   | 100% | 0%   | 0%   | 0%   | 0%   | 0%   | 0%   | 0%   | 0%   | 0%   | 0%   | 0%   | 0%   | 0%   | 0%   | 0%   | 0%   |
| 193     | DPB1 | 0%   | 0%   | 0%   | 0%   | 0%   | 100% | 0%   | 21%  | 0%   | 38%  | 24%  | 5%   | 21%  | 0%   | 0%   | 0%   | 0%   | 0%   | 0%   | 0%   | 0%   |
| 51      | DQA1 | 0%   | 0%   | 0%   | 0%   | 0%   | 0%   | 100% | 0%   | 0%   | 0%   | 0%   | 0%   | 0%   | 0%   | 0%   | 0%   | 0%   | 0%   | 0%   | 0%   | 0%   |
| 459     | DQB1 | 0%   | 0%   | 0%   | 0%   | 0%   | 12%  | 0%   | 100% | 0%   | 31%  | 17%  | 2%   | 11%  | 0%   | 0%   | 0%   | 0%   | 0%   | 0%   | 0%   | 0%   |
| 7       | DRA  | 0%   | 0%   | 0%   | 0%   | 0%   | 0%   | 0%   | 0%   | 100% | 0%   | 0%   | 0%   | 0%   | 0%   | 0%   | 0%   | 0%   | 0%   | 0%   | 0%   | 0%   |
| 1374    | DRB1 | 0%   | 0%   | 0%   | 0%   | 0%   | 34%  | 0%   | 23%  | 0%   | 100% | 100% | 39%  | 76%  | 0%   | 0%   | 0%   | 0%   | 0%   | 0%   | 0%   | 0%   |
| 59      | DRB3 | 0%   | 0%   | 0%   | 0%   | 0%   | 18%  | 0%   | 17%  | 0%   | 100% | 100% | 15%  | 50%  | 0%   | 0%   | 0%   | 0%   | 0%   | 0%   | 0%   | 0%   |
| 16      | DRB4 | 0%   | 0%   | 0%   | 0%   | 0%   | 9%   | 0%   | 10%  | 0%   | 100% | 61%  | 100% | 50%  | 0%   | 0%   | 0%   | 0%   | 0%   | 0%   | 0%   | 0%   |
| 21      | DRB5 | 0%   | 0%   | 0%   | 0%   | 0%   | 18%  | 0%   | 10%  | 0%   | 100% | 61%  | 22%  | 100% | 0%   | 0%   | 0%   | 0%   | 0%   | 0%   | 0%   | 0%   |
| 13      | E    | 13%  | 10%  | 13%  | 0%   | 0%   | 0%   | 0%   | 0%   | 0%   | 0%   | 0%   | 0%   | 0%   | 100% | 0%   | 3%   | 6%   | 0%   | 0%   | 0%   | 1%   |
| 22      | F    | 8%   | 15%  | 13%  | 0%   | 0%   | 0%   | 0%   | 0%   | 0%   | 0%   | 0%   | 0%   | 0%   | 0%   | 100% | 2%   | 3%   | 1%   | 1%   | 1%   | 0%   |
| 50      | G    | 33%  | 29%  | 29%  | 0%   | 0%   | 0%   | 0%   | 0%   | 0%   | 0%   | 0%   | 0%   | 0%   | 3%   | 2%   | 100% | 6%   | 7%   | 7%   | 4%   | 0%   |
| 12      | H    | 84%  | 50%  | 38%  | 0%   | 0%   | 0%   | 0%   | 0%   | 0%   | 0%   | 0%   | 0%   | 0%   | 6%   | 3%   | 5%   | 100% | 9%   | 6%   | 4%   | 2%   |
| 9       | J    | 23%  | 28%  | 39%  | 0%   | 0%   | 0%   | 0%   | 0%   | 0%   | 0%   | 0%   | 0%   | 0%   | 0%   | 1%   | 9%   | 9%   | 100% | 4%   | 10%  | 0%   |
| 6       | K    | 24%  | 14%  | 16%  | 0%   | 0%   | 0%   | 0%   | 0%   | 0%   | 0%   | 0%   | 0%   | 0%   | 0%   | 1%   | 7%   | 6%   | 4%   | 100% | 3%   | 0%   |
| 5       | L    | 16%  | 19%  | 21%  | 0%   | 0%   | 0%   | 0%   | 0%   | 0%   | 0%   | 0%   | 0%   | 0%   | 0%   | 1%   | 4%   | 4%   | 10%  | 3%   | 100% | 0%   |
| 3       | V    | 8%   | 11%  | 7%   | 0%   | 0%   | 0%   | 0%   | 0%   | 0%   | 0%   | 0%   | 0%   | 0%   | 2%   | 0%   | 0%   | 2%   | 0%   | 0%   | 1%   | 100% |
