# Supplementary material for: High-Accuracy HLA Type Inference from Whole-Genome Sequencing Data Using Population Reference Graphs
Source: PubMed Central journal article supplement (PMC5085092; doi:10.1371/journal.pcbi.1005151), 2016-10-28

### Insert size statistics for cohorts

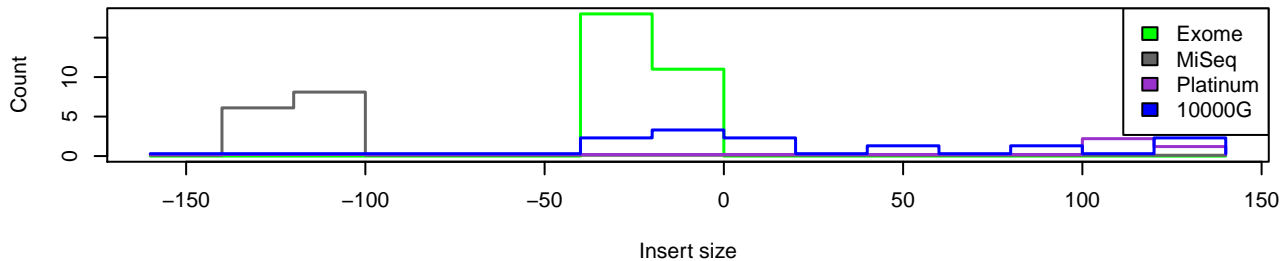

### Insert size / error

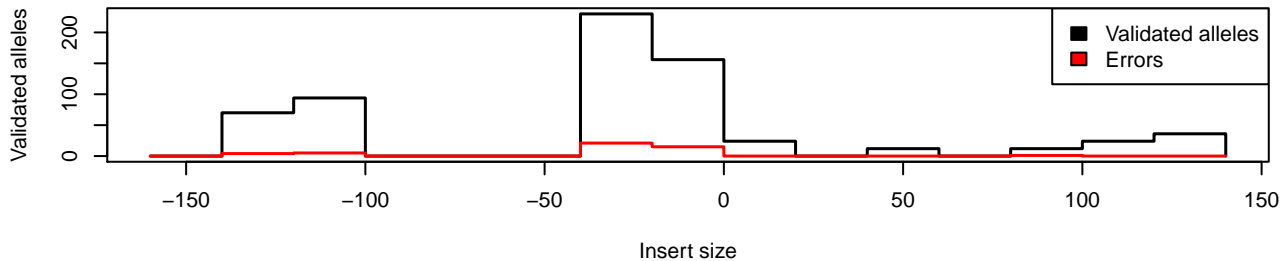

### Effective fragment length per cohort

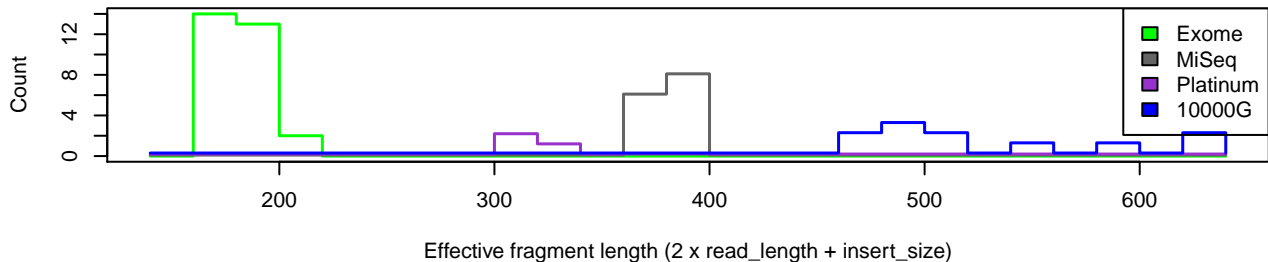

### Fragment length / error

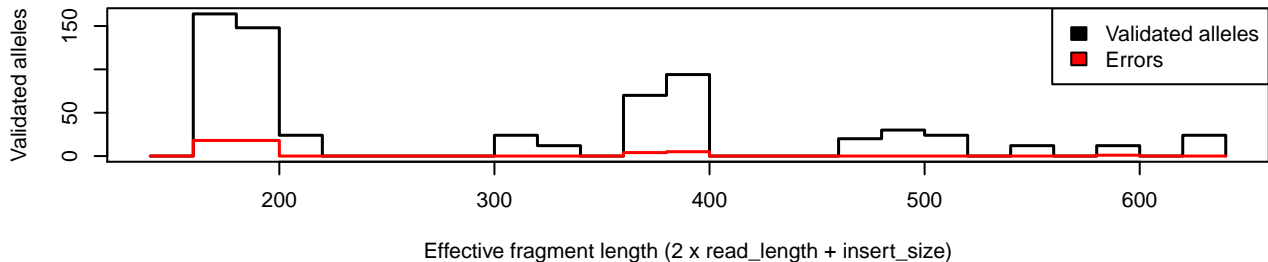

Supplement: pcbi.1005151.s005.pdf [file pcbi.1005151.s005.pdf]
